# Supplementary material for: Hydrothermal syntheses and crystal structures of two-dimensional (2D) layered vanadium oxide complexes: M(bipy)(H2O)V2O6 (M = Ni, Co, bipy = bipyridine) and [Ni(bipy)2V6O17]
Source: Royal Society of Chemistry journal article supplement (doi:10.1039/b105700f), 2002-01-01
Supplement: b105700f.pdf [file b105700f.pdf]

## The supplementary materials

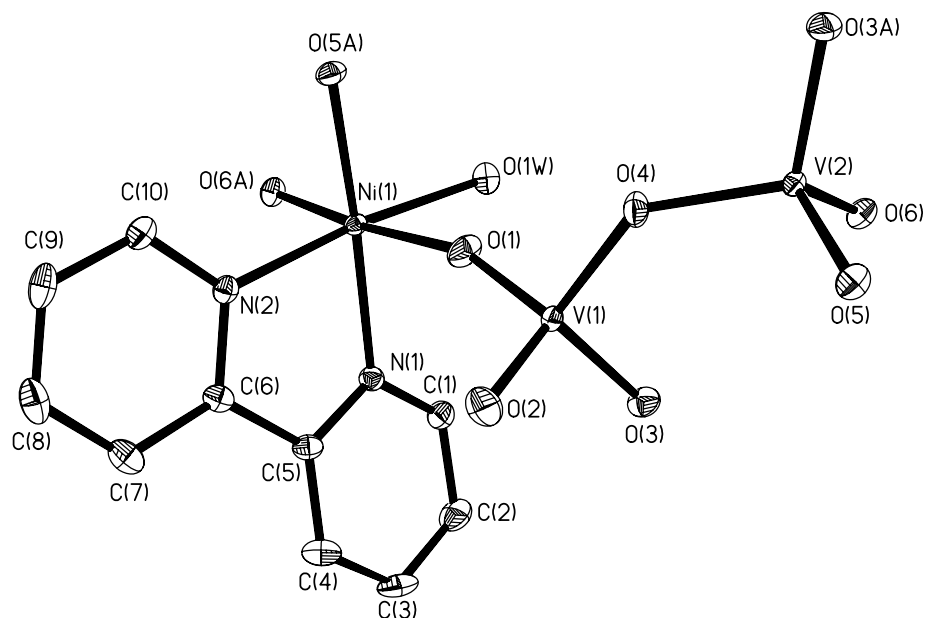

**Fig. S1.** A fragment of the net with the atomic labeling scheme (30% probability) in complex 1.

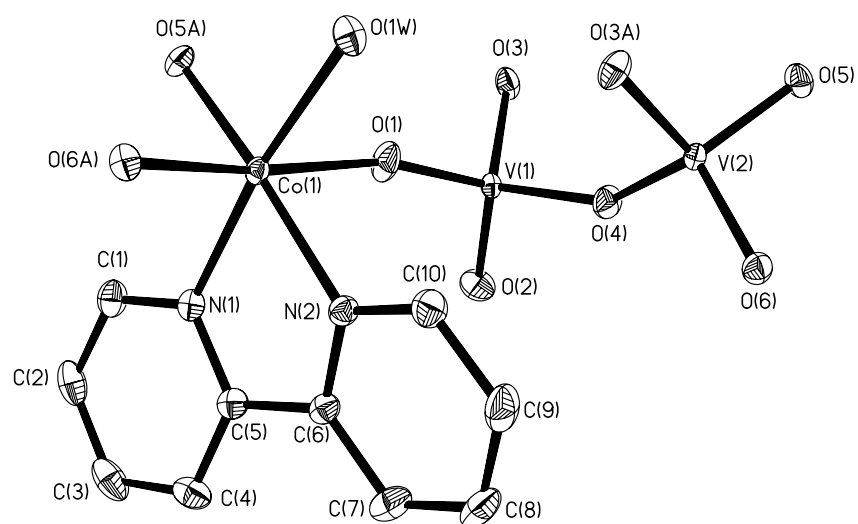

**Fig. S2.** A fragment of the net with the atomic labeling scheme (30% probability) in complex 3.

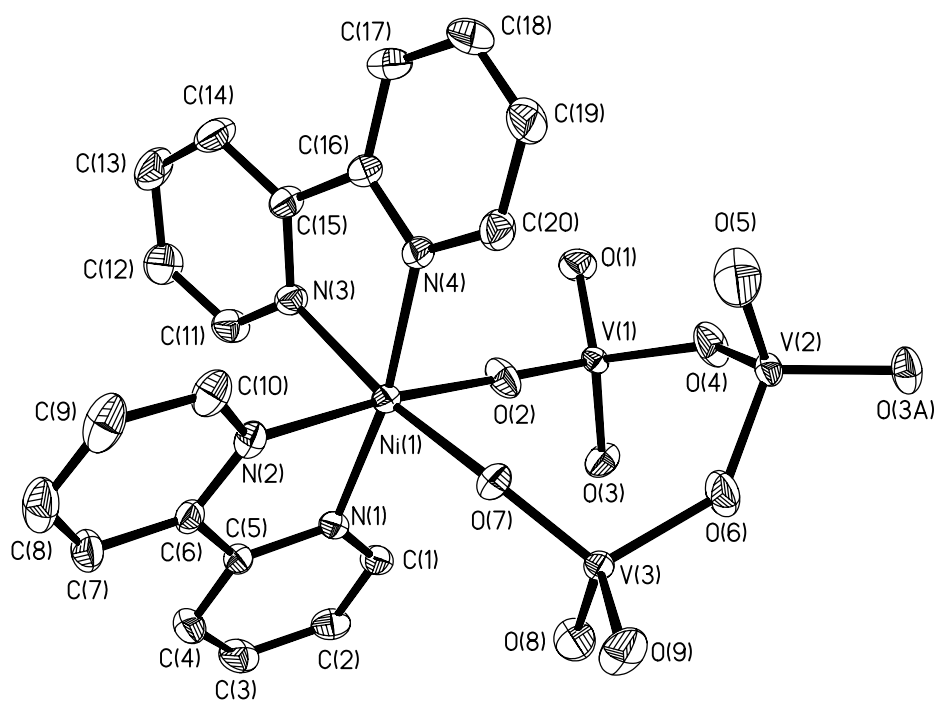

**Fig. S3.** A basic structure unit of the layer with the atomic labeling scheme (30% probability) in complex **2**.
